# Supplementary material
Source: Springer Nature journal article supplement (https://www.springermedizin.de/resource/supplementary/13054_2010_9530_MOESM1_ESM.pdf/9706364)

**MAP**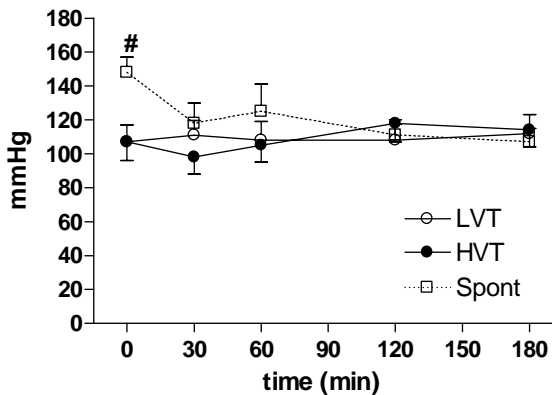**PaO<sub>2</sub>/FiO<sub>2</sub>**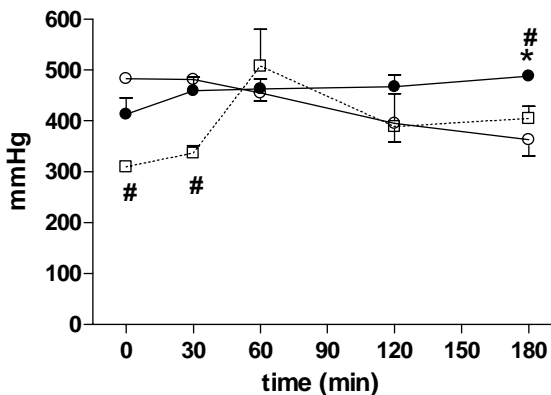**Crs**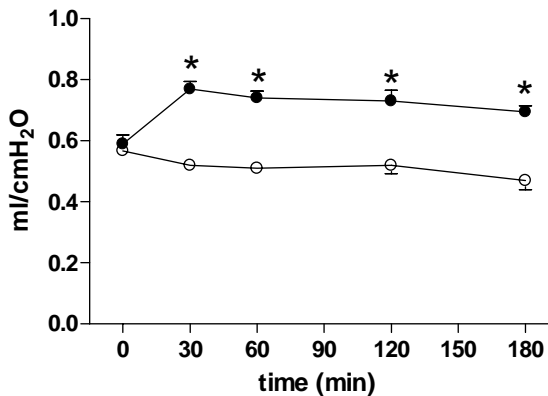**PaCO<sub>2</sub>**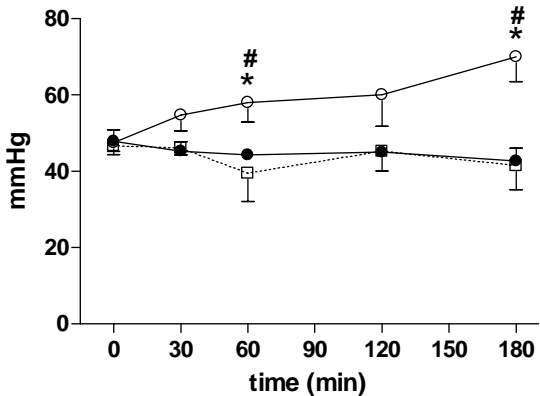**Pplateau**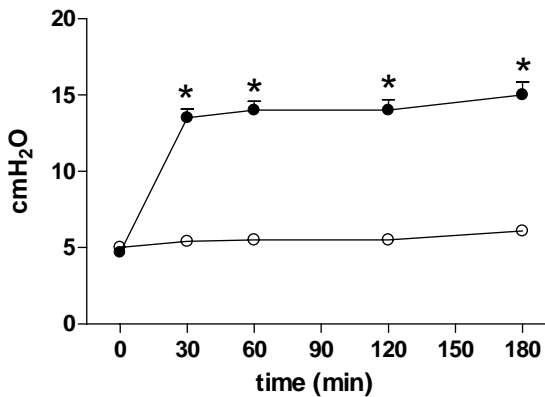**pH**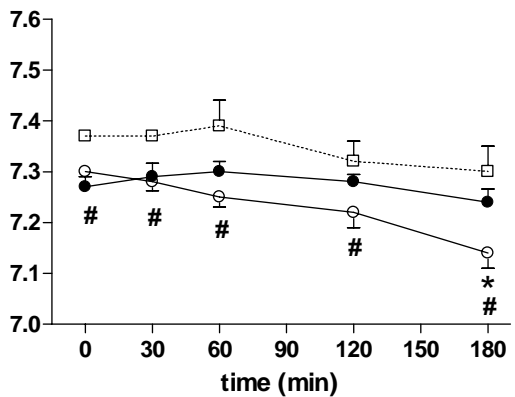

Supplement: MOESM1 [file 9706364]
